# Supplementary material
Source: Springer Nature journal article supplement (https://www.springermedizin.de/resource/supplementary/12889_2013_5420_MOESM1_ESM.pdf/9495384)
Supplement: MOESM1 [file 9495384]

## 1. YOUR OWN HEALTH

What is your current state of health? (Mark only one)

Poor  Not so good  Good  Very good

| Do you have or have you had?                               | Yes                      | No                       | Age first time       |
|------------------------------------------------------------|--------------------------|--------------------------|----------------------|
| Asthma.....                                                | <input type="checkbox"/> | <input type="checkbox"/> | <input type="text"/> |
| Chronic bronchitis, emphysema, COPD.....                   | <input type="checkbox"/> | <input type="checkbox"/> | <input type="text"/> |
| Diabetes.....                                              | <input type="checkbox"/> | <input type="checkbox"/> | <input type="text"/> |
| Fibromyalgia/chronic pain syndrome.....                    | <input type="checkbox"/> | <input type="checkbox"/> | <input type="text"/> |
| Psychological problems for which you have sought help..... | <input type="checkbox"/> | <input type="checkbox"/> | <input type="text"/> |
| Myocardial infarction (heart attack).....                  | <input type="checkbox"/> | <input type="checkbox"/> | <input type="text"/> |
| Angina pectoris (heart cramp).....                         | <input type="checkbox"/> | <input type="checkbox"/> | <input type="text"/> |
| Cerebral stroke/brain haemorrhage.....                     | <input type="checkbox"/> | <input type="checkbox"/> | <input type="text"/> |
| Multiple sclerosis.....                                    | <input type="checkbox"/> | <input type="checkbox"/> | <input type="text"/> |
| Ulcerous colitis.....                                      | <input type="checkbox"/> | <input type="checkbox"/> | <input type="text"/> |

Do you get pain or discomfort in the chest when walking up hills or stairs, or walking fast on level ground?.....  Yes  No

Do you get such pain or discomfort even if you are resting?.....  Yes  No

## 2. MUSCULO AND SKELETAL PAIN

Have you during the last year suffered from pain and/or stiffness in muscles or joints that has lasted for at least 3 months?.....  Yes  No

Have you ever had:

a wrist/forearm fracture?.....  Yes  No  Age last time

a hip fracture?.....  Yes  No  Age last time

## 3. STOMACH AND INTESTINAL SYMPTOMS

Have you experienced pyrosis/heartburn almost daily for at least a week?.....  Yes  No

Have you ever had pains/aches in the stomach lasting for at least 2 weeks?.....  Yes  No

If yes, where in the stomach are the pains situated? (Mark only one)

Upper part  Lower part  The whole stomach

Normally, for how long time are the stomach pains present?

(Mark one)

For periods of weeks length.....

For periods of months length.....

Always.....

Do you often suffer from flatulence, rumbling in the stomach or much wind?.....  Yes  No

Is your stool usually:

Normal  Loose  Hard and lumpy  
 Alternating hard and loose  Smelly

Do you for some periods of time have three stools per day or more?.....  Yes  No

Have you had stomach/intestinal problems after consuming milk?.....  Yes  No

Are there others in your family with similar stomach symptoms?  
 Mother  Father  Siblings  Child  None

## 4. OTHER PAINS/PROBLEMS

Listed below are some symptoms or problems. Have you experienced any of these during the last week (including today)?

(Tick one box for each item)

|                                                     | Not affected             | Slightly affected        | Affected quite a lot     | Severely affected        |
|-----------------------------------------------------|--------------------------|--------------------------|--------------------------|--------------------------|
| Sudden unfounded fears.....                         | <input type="checkbox"/> | <input type="checkbox"/> | <input type="checkbox"/> | <input type="checkbox"/> |
| Felt frightened or anxious.....                     | <input type="checkbox"/> | <input type="checkbox"/> | <input type="checkbox"/> | <input type="checkbox"/> |
| Faintness or dizziness.....                         | <input type="checkbox"/> | <input type="checkbox"/> | <input type="checkbox"/> | <input type="checkbox"/> |
| Felt tense or upset.....                            | <input type="checkbox"/> | <input type="checkbox"/> | <input type="checkbox"/> | <input type="checkbox"/> |
| Had a tendency to easily blame yourself.....        | <input type="checkbox"/> | <input type="checkbox"/> | <input type="checkbox"/> | <input type="checkbox"/> |
| Insomnia/sleeplessness.....                         | <input type="checkbox"/> | <input type="checkbox"/> | <input type="checkbox"/> | <input type="checkbox"/> |
| Felt dejected or melancholic....                    | <input type="checkbox"/> | <input type="checkbox"/> | <input type="checkbox"/> | <input type="checkbox"/> |
| Had a feeling of being useless/of little value..... | <input type="checkbox"/> | <input type="checkbox"/> | <input type="checkbox"/> | <input type="checkbox"/> |
| Felt that everything is a struggle                  | <input type="checkbox"/> | <input type="checkbox"/> | <input type="checkbox"/> | <input type="checkbox"/> |
| Feeling of hopelessness regarding the future.....   | <input type="checkbox"/> | <input type="checkbox"/> | <input type="checkbox"/> | <input type="checkbox"/> |
| Had thoughts of ending your life                    | <input type="checkbox"/> | <input type="checkbox"/> | <input type="checkbox"/> | <input type="checkbox"/> |

## 5. ILLNESS IN THE FAMILY

Have one or more of your parents or siblings had a heart attack or angina (heart cramp)?.....  Yes  No  Don't know

Tick off relatives who have, or have ever had, any of the following conditions, and report the age of when they got the illnesses.

(If several siblings, report the one who got the illness at the youngest age)

|                                           | Mother                   | Father                   | Sister                   | Brother                  | Child                    | None                     | Age first time       |
|-------------------------------------------|--------------------------|--------------------------|--------------------------|--------------------------|--------------------------|--------------------------|----------------------|
| Myocardial infarction before age 60.....  | <input type="checkbox"/> | <input type="checkbox"/> | <input type="checkbox"/> | <input type="checkbox"/> | <input type="checkbox"/> | <input type="checkbox"/> | <input type="text"/> |
| Myocardial infarction after age 60.....   | <input type="checkbox"/> | <input type="checkbox"/> | <input type="checkbox"/> | <input type="checkbox"/> | <input type="checkbox"/> | <input type="checkbox"/> | <input type="text"/> |
| Diabetes.....                             | <input type="checkbox"/> | <input type="checkbox"/> | <input type="checkbox"/> | <input type="checkbox"/> | <input type="checkbox"/> | <input type="checkbox"/> | <input type="text"/> |
| Cerebral stroke or brain haemorrhage..... | <input type="checkbox"/> | <input type="checkbox"/> | <input type="checkbox"/> | <input type="checkbox"/> | <input type="checkbox"/> | <input type="checkbox"/> | <input type="text"/> |
| Asthma.....                               | <input type="checkbox"/> | <input type="checkbox"/> | <input type="checkbox"/> | <input type="checkbox"/> | <input type="checkbox"/> | <input type="checkbox"/> | <input type="text"/> |
| Colon cancer.....                         | <input type="checkbox"/> | <input type="checkbox"/> | <input type="checkbox"/> | <input type="checkbox"/> | <input type="checkbox"/> | <input type="checkbox"/> | <input type="text"/> |
| Breast cancer.....                        | <input type="checkbox"/> | <input type="checkbox"/> | <input type="checkbox"/> | <input type="checkbox"/> | <input type="checkbox"/> | <input type="checkbox"/> | <input type="text"/> |
| Ovarian cancer.....                       | <input type="checkbox"/> | <input type="checkbox"/> | <input type="checkbox"/> | <input type="checkbox"/> | <input type="checkbox"/> | <input type="checkbox"/> | <input type="text"/> |

How many siblings do you have?.....  Brothers  Sisters

## 6. USE OF MEDICATION

Medicines, in this context, means medicines bought at a pharmacy.  
Food supplements and vitamins are not included here.

### Do you take?

|                                     | Currently                | Previously,<br>but not now | Never<br>used            |
|-------------------------------------|--------------------------|----------------------------|--------------------------|
| Medications for high blood pressure | <input type="checkbox"/> | <input type="checkbox"/>   | <input type="checkbox"/> |
| Cholesterol reducing medication     | <input type="checkbox"/> | <input type="checkbox"/>   | <input type="checkbox"/> |
| Insulin                             | <input type="checkbox"/> | <input type="checkbox"/>   | <input type="checkbox"/> |
| Tablets for diabetes                | <input type="checkbox"/> | <input type="checkbox"/>   | <input type="checkbox"/> |

### How often during the last 4 weeks have you used the following medications? (Tick one box for each line)

|                                   | Not used<br>for the last<br>4 weeks | Less<br>frequently<br>than every<br>week | Every<br>not daily       | Daily                    |
|-----------------------------------|-------------------------------------|------------------------------------------|--------------------------|--------------------------|
| Pain killers without prescription | <input type="checkbox"/>            | <input type="checkbox"/>                 | <input type="checkbox"/> | <input type="checkbox"/> |
| Pain killers with prescription    | <input type="checkbox"/>            | <input type="checkbox"/>                 | <input type="checkbox"/> | <input type="checkbox"/> |
| Sleeping pills                    | <input type="checkbox"/>            | <input type="checkbox"/>                 | <input type="checkbox"/> | <input type="checkbox"/> |
| Tranquilizers                     | <input type="checkbox"/>            | <input type="checkbox"/>                 | <input type="checkbox"/> | <input type="checkbox"/> |
| Antidepressants                   | <input type="checkbox"/>            | <input type="checkbox"/>                 | <input type="checkbox"/> | <input type="checkbox"/> |
| Other prescribed medicines        | <input type="checkbox"/>            | <input type="checkbox"/>                 | <input type="checkbox"/> | <input type="checkbox"/> |

For those medicines you have ticked off in the last two items, and you have taken during the last 4 weeks:

### State the name of the medicines and your reason for taking/having taken them (disease, symptom): (Tick one box for each line)

| Brand name of medicine<br>(one name per line) | Reason for use of medicine | For how long time?       |                          |
|-----------------------------------------------|----------------------------|--------------------------|--------------------------|
|                                               |                            | Up to<br>one year        | One year<br>or more      |
|                                               |                            | <input type="checkbox"/> | <input type="checkbox"/> |
|                                               |                            | <input type="checkbox"/> | <input type="checkbox"/> |
|                                               |                            | <input type="checkbox"/> | <input type="checkbox"/> |
|                                               |                            | <input type="checkbox"/> | <input type="checkbox"/> |

If there is not enough space here, continue on a separate page and enclose it with the form.

## 7. FOOD AND BEVERAGES

### How often do you usually eat the following foods?

|                        | Rarely/<br>never         | 1-3 t. p.<br>month       | 1-3 t. p.<br>week        | 4-6 t. p.<br>week        | 1-2 t. p.<br>day         | 3 t. or<br>more p.<br>day |
|------------------------|--------------------------|--------------------------|--------------------------|--------------------------|--------------------------|---------------------------|
| Fruit                  | <input type="checkbox"/> | <input type="checkbox"/> | <input type="checkbox"/> | <input type="checkbox"/> | <input type="checkbox"/> | <input type="checkbox"/>  |
| Berries                | <input type="checkbox"/> | <input type="checkbox"/> | <input type="checkbox"/> | <input type="checkbox"/> | <input type="checkbox"/> | <input type="checkbox"/>  |
| Cheese (all types)     | <input type="checkbox"/> | <input type="checkbox"/> | <input type="checkbox"/> | <input type="checkbox"/> | <input type="checkbox"/> | <input type="checkbox"/>  |
| Potatoes               | <input type="checkbox"/> | <input type="checkbox"/> | <input type="checkbox"/> | <input type="checkbox"/> | <input type="checkbox"/> | <input type="checkbox"/>  |
| Boiled vegetables      | <input type="checkbox"/> | <input type="checkbox"/> | <input type="checkbox"/> | <input type="checkbox"/> | <input type="checkbox"/> | <input type="checkbox"/>  |
| Fresh vegetables/salad | <input type="checkbox"/> | <input type="checkbox"/> | <input type="checkbox"/> | <input type="checkbox"/> | <input type="checkbox"/> | <input type="checkbox"/>  |

### What type of fat do you usually use? (Tick one box for each line)

|             | Do not<br>use            | Butter                   | Hard<br>margarine        | Soft/light<br>margarine  | Oils                     | Other                    |
|-------------|--------------------------|--------------------------|--------------------------|--------------------------|--------------------------|--------------------------|
| On bread    | <input type="checkbox"/> | <input type="checkbox"/> | <input type="checkbox"/> | <input type="checkbox"/> | <input type="checkbox"/> | <input type="checkbox"/> |
| For cooking | <input type="checkbox"/> | <input type="checkbox"/> | <input type="checkbox"/> | <input type="checkbox"/> | <input type="checkbox"/> | <input type="checkbox"/> |

### Do you use the following food supplements?

|                                         | Yes, daily               | Sometimes                | No                       |
|-----------------------------------------|--------------------------|--------------------------|--------------------------|
| Cod liver oil or cod liver oil capsules | <input type="checkbox"/> | <input type="checkbox"/> | <input type="checkbox"/> |
| Fish oil capsules (omega 3)             | <input type="checkbox"/> | <input type="checkbox"/> | <input type="checkbox"/> |
| Vitamins and/or mineral supplement      | <input type="checkbox"/> | <input type="checkbox"/> | <input type="checkbox"/> |

### How much do you normally drink of the following?

(Tick one box for each line)

|                                                                  | Rarely/<br>never         | 1-6<br>glasses<br>per<br>week | 1 glass<br>per day       | 2-3<br>glasses<br>per day | 4 glasses<br>a day or<br>more |
|------------------------------------------------------------------|--------------------------|-------------------------------|--------------------------|---------------------------|-------------------------------|
| Full milk, full-fat curdled milk and yoghurt                     | <input type="checkbox"/> | <input type="checkbox"/>      | <input type="checkbox"/> | <input type="checkbox"/>  | <input type="checkbox"/>      |
| Semi-skimmed milk, semi-skimmed curdled milk and low-fat yoghurt | <input type="checkbox"/> | <input type="checkbox"/>      | <input type="checkbox"/> | <input type="checkbox"/>  | <input type="checkbox"/>      |
| Skimmed milk and skimmed curdled milk                            | <input type="checkbox"/> | <input type="checkbox"/>      | <input type="checkbox"/> | <input type="checkbox"/>  | <input type="checkbox"/>      |
| Semi-skimmed milk                                                | <input type="checkbox"/> | <input type="checkbox"/>      | <input type="checkbox"/> | <input type="checkbox"/>  | <input type="checkbox"/>      |
| Fruitjuice                                                       | <input type="checkbox"/> | <input type="checkbox"/>      | <input type="checkbox"/> | <input type="checkbox"/>  | <input type="checkbox"/>      |
| Water                                                            | <input type="checkbox"/> | <input type="checkbox"/>      | <input type="checkbox"/> | <input type="checkbox"/>  | <input type="checkbox"/>      |
| Soft-drinks/cola-drinks with sugar                               | <input type="checkbox"/> | <input type="checkbox"/>      | <input type="checkbox"/> | <input type="checkbox"/>  | <input type="checkbox"/>      |
| Soft-drinks/cola-drinks without sugar                            | <input type="checkbox"/> | <input type="checkbox"/>      | <input type="checkbox"/> | <input type="checkbox"/>  | <input type="checkbox"/>      |

### How many cups of coffee and tea do you usually drink per day?

(Write 0 for the types you do not drink daily)

|                                                    | Number of<br>cups    |
|----------------------------------------------------|----------------------|
| Filtered coffee                                    | <input type="text"/> |
| Boiled coffee (coarsely ground coffee for brewing) | <input type="text"/> |
| Other coffee                                       | <input type="text"/> |
| Tea                                                | <input type="text"/> |

### How often during the last year have you consumed alcohol?

(Low alcohol beer and non-alcoholic beer are not included)

|                                  |                          |
|----------------------------------|--------------------------|
| Never consumed alcohol           | <input type="checkbox"/> |
| Not during the last year         | <input type="checkbox"/> |
| A few times during the last year | <input type="checkbox"/> |
| 1 time per month                 | <input type="checkbox"/> |
| 2-3 times per month              | <input type="checkbox"/> |
| 1 time per week                  | <input type="checkbox"/> |
| 2-3 times per week               | <input type="checkbox"/> |
| 4-7 times per week               | <input type="checkbox"/> |

To those who have consumed alcohol during the past year:

When you drink alcohol, how many glasses or drinks do you normally drink?  Antall

Approximately how many times during the last year have you consumed alcohol equivalent to 5 glasses or drinks within 24 hours?  Antall ganger

### When you drink alcohol, do you normally drink:

(Tick one or more boxes)

Beer  Wine  Spirits

## 8. SMOKING AND SNUFF USE

How many hours a day do you normally spend in smoke-filled rooms?  Number of whole hours

Did any of the adults smoke at home while you were growing up?  Yes  No

Do you currently, or did you previously live together with a daily smoker after your 20th birthday?

Are you currently, or were you preciously a daily smoker?  Yes, currently  Yes, previously  Never

If current daily smoker, do you smoke  Yes  No  
 Cigarettes.....    
 Cigars/cigarillos/pipe.....    
 Rolling tobacco.....

If you previously smoked daily, how many years is it since you stopped smoking?   Number of years

If you currently smoke, or have smoked before, how many cigarettes do/did you smoke per day?   Number of cigarettes

If you currently smoke, or have smoked before, how old were you when you began smoking daily?   Age in years

If you currently smoke, or have smoked before, how many years in all have you smoked daily?   Number of years

Do you take or have you been taking snuff daily?  Yes, currently  Yes, previously  Never

If you have been taking snuff, for how many years in all have you been taking snuff?   Number of years

### 9. EXERCISE AND PHYSICAL ACTIVITY

How has your physical activity in leisure time been during this last year? (Think of your weekly average for the year. Time spent going to work count as leisure time. Answer both questions)

|                                                      | Hours per week           |                          |                          |                          |
|------------------------------------------------------|--------------------------|--------------------------|--------------------------|--------------------------|
|                                                      | None                     | Less than 1 hour         | 1-2 hours                | 3 hours or more          |
| Light activity (not sweating or out of breath).....  | <input type="checkbox"/> | <input type="checkbox"/> | <input type="checkbox"/> | <input type="checkbox"/> |
| Hard physical activity (sweating/out of breath)..... | <input type="checkbox"/> | <input type="checkbox"/> | <input type="checkbox"/> | <input type="checkbox"/> |

Describe your exercise and physical exertion in leisure time. If your activity varies much, for example between summer and winter, then give an average. The question refers only to the last twelve months. (Tick the box that is most appropriate)

Reading, watching TV, or other sedentary activity.....   
 Walking, cycling, or other forms of exercise at least 4 hours a week (This should include walking or cycling to work, Sunday stroll/walk, etc.).....   
 Participation in recreational sports, heavy gardening, etc. (note: duration of activity at least 4 hours a week).....   
 Participation in hard training or sports competitions regularly and several times a week.....

### 10. EDUCATION AND WORK

How many years of schooling/education have you completed? (Count all years you have attended school or been studying).....   Number of years

How content are you with your job?  Very content  Content  Discontent  Very discontent

Do you believe that you are in danger of losing your current work or income within the next 2 years?.....  Yes  No

Do you receive any of the following benefits?  Yes  No

Sickness benefit/Sick pay.....    
 Rehabilitation benefit.....    
 Social welfare benefits.....    
 Transition benefit for single parents.....

### 11. THE REST OF THE QUESTIONNAIRE IS TO BE ANSWERED BY WOMEN ONLY

How old were you when you started menstruating?..... Age in years

If you no longer menstruate, how old were you when you stopped menstruating?..... Age in years

Are you pregnant at the moment?  Yes  No  Uncertain  Above fertile age

How many children have you given birth to?..... Number of children

If you have given birth, enter what year each child was born and how many months you did breastfeed after the birth?

(If you didn't breastfeed, write 0)

| Children      | Year of birth                                                                       | Breastfed number of months                |
|---------------|-------------------------------------------------------------------------------------|-------------------------------------------|
| 1. child..... | <input type="text"/> <input type="text"/> <input type="text"/> <input type="text"/> | <input type="text"/> <input type="text"/> |
| 2. child..... | <input type="text"/> <input type="text"/> <input type="text"/> <input type="text"/> | <input type="text"/> <input type="text"/> |
| 3. child..... | <input type="text"/> <input type="text"/> <input type="text"/> <input type="text"/> | <input type="text"/> <input type="text"/> |
| 4. child..... | <input type="text"/> <input type="text"/> <input type="text"/> <input type="text"/> | <input type="text"/> <input type="text"/> |
| 5. child..... | <input type="text"/> <input type="text"/> <input type="text"/> <input type="text"/> | <input type="text"/> <input type="text"/> |

(If more children, use an extra sheet of paper)

Do you use or have you ever used? (Tick one box for each line)

|                                                            | Currently                | Previously, but not now  | Never used               |
|------------------------------------------------------------|--------------------------|--------------------------|--------------------------|
| Contraceptive pills/minipill/contraceptive injection?..... | <input type="checkbox"/> | <input type="checkbox"/> | <input type="checkbox"/> |
| Hormonal intrauterine device?.....                         | <input type="checkbox"/> | <input type="checkbox"/> | <input type="checkbox"/> |
| Estrogen (tablets or patches)?.....                        | <input type="checkbox"/> | <input type="checkbox"/> | <input type="checkbox"/> |
| Estrogen (cream or suppositories)?.....                    | <input type="checkbox"/> | <input type="checkbox"/> | <input type="checkbox"/> |

If you use/have used prescription obliged estrogen, for how many years have you used it?..... Number of years

If you use contraceptive pills, hormonal intrauterine device, or estrogen, what brand do you currently use? Specify

### USE OF HEALTH SERVICES

How many times during the past year have you personally used? (Tick one box for each line)

|                                | None                     | 1-3 times                | 4+                       |
|--------------------------------|--------------------------|--------------------------|--------------------------|
| GP (general practitioner)..... | <input type="checkbox"/> | <input type="checkbox"/> | <input type="checkbox"/> |
| Medical specialist.....        | <input type="checkbox"/> | <input type="checkbox"/> | <input type="checkbox"/> |
| Emergency GP.....              | <input type="checkbox"/> | <input type="checkbox"/> | <input type="checkbox"/> |
| Admission to a hospital.....   | <input type="checkbox"/> | <input type="checkbox"/> | <input type="checkbox"/> |
| Home nursing care.....         | <input type="checkbox"/> | <input type="checkbox"/> | <input type="checkbox"/> |

|                                              |                          |                          |                          |
|----------------------------------------------|--------------------------|--------------------------|--------------------------|
|                                              |                          | 1-3                      |                          |
|                                              | None                     | times                    | 4+                       |
| Home aid, organised by the municipality..... | <input type="checkbox"/> | <input type="checkbox"/> | <input type="checkbox"/> |
| Physiotherapist .....                        | <input type="checkbox"/> | <input type="checkbox"/> | <input type="checkbox"/> |
| Chiropractor.....                            | <input type="checkbox"/> | <input type="checkbox"/> | <input type="checkbox"/> |
| Dentist.....                                 | <input type="checkbox"/> | <input type="checkbox"/> | <input type="checkbox"/> |
| Alternative medical practitioner.....        | <input type="checkbox"/> | <input type="checkbox"/> | <input type="checkbox"/> |

**How many doctors have you been seeing for the last 12 months?**.....(Number)

**Have you been given a regular GP, whose name you know?**.....  Yes  No

**When you are being examined, which language do you and your doctor communicate in?** (Tick one or more boxes)

Norwegian  Sami  Use an interpreter  
 Other language

**Do you think it happens that you and your doctor misunderstand each other due to linguistic problems?**

Never  Rarely  Sometimes  Often  Not sure

**If an interpreter is needed, is your doctor good enough to request it?**

Yes, always  Yes, most of the time  No, not always  
 No, never  Don't like to use interpreter

**How satisfied/dissatisfied are you with the following aspects with the municipal health service in your municipality?**  
 (Tick one box for each line)

|                                                                                                          |                          |                          |                          |                          |
|----------------------------------------------------------------------------------------------------------|--------------------------|--------------------------|--------------------------|--------------------------|
|                                                                                                          | Very satisfied           | Satisfied                | Dis-satisfied            | Don't know               |
| The distance to your doctor?.....                                                                        | <input type="checkbox"/> | <input type="checkbox"/> | <input type="checkbox"/> | <input type="checkbox"/> |
| Your doctor's availability on telephone?                                                                 | <input type="checkbox"/> | <input type="checkbox"/> | <input type="checkbox"/> | <input type="checkbox"/> |
| How soon you can get an appointment with your doctor?.....                                               | <input type="checkbox"/> | <input type="checkbox"/> | <input type="checkbox"/> | <input type="checkbox"/> |
| How long time you are allowed with your doctor?.....                                                     | <input type="checkbox"/> | <input type="checkbox"/> | <input type="checkbox"/> | <input type="checkbox"/> |
| Your possibility to explain about you pains and problems?.....                                           | <input type="checkbox"/> | <input type="checkbox"/> | <input type="checkbox"/> | <input type="checkbox"/> |
| Your doctor's understanding of your cultural background? .....                                           | <input type="checkbox"/> | <input type="checkbox"/> | <input type="checkbox"/> | <input type="checkbox"/> |
| The information your doctor gives about your health and the examination and treatment you get? .....     | <input type="checkbox"/> | <input type="checkbox"/> | <input type="checkbox"/> | <input type="checkbox"/> |
| Your doctor's language skills (Sami or Norwegian)?.....                                                  | <input type="checkbox"/> | <input type="checkbox"/> | <input type="checkbox"/> | <input type="checkbox"/> |
| The local health services in your municipality totally? .....                                            | <input type="checkbox"/> | <input type="checkbox"/> | <input type="checkbox"/> | <input type="checkbox"/> |
| On the whole, how satisfied/dissatisfied are you with the local health services in your municipality?... | <input type="checkbox"/> | <input type="checkbox"/> | <input type="checkbox"/> | <input type="checkbox"/> |

**How long is it since you last went to see a doctor?**..... (Report whole numbers)

**If you have ever used an alternative practitioner, which did you use?** (Tick one or more boxes)

A traditional healer (guvllar, reader, "blåser", laying on of hands)   
 A (modern) healer.....

An acupuncture practitioner.....   
 A zone therapist, homeopath, kinesiologist etc.....

**How long is it since you last used an alternative practitioner?** (Report whole numbers)

**Suppose that you would get the need for help/assistance from the local health- and social services** (home nursing care, home assistance services, social services, physiotherapy etc.).

Do you know where to approach?.....  Yes  No  Uncertain  
 Do you feel confident that you will receive help if you need it?.....     
 If you today receive help from the local health and social services, are you satisfied with the help they offer?.....

**INJURIES/ACCIDENTS**

**Have you been in accidents that resulted in treatment by a doctor and/or hospital admission?**

|                         |                          |                          |                                           |
|-------------------------|--------------------------|--------------------------|-------------------------------------------|
|                         | Yes                      | No                       | Number of times                           |
| Doctor.....             | <input type="checkbox"/> | <input type="checkbox"/> | <input type="text"/> <input type="text"/> |
| Hospital admission..... | <input type="checkbox"/> | <input type="checkbox"/> | <input type="text"/> <input type="text"/> |

**If yes, what kind of accidents have you been treated for?**

|                           |                          |                          |                          |                          |
|---------------------------|--------------------------|--------------------------|--------------------------|--------------------------|
|                           | At work                  | At home                  | During leisure time      | No                       |
| Car accident.....         | <input type="checkbox"/> | <input type="checkbox"/> | <input type="checkbox"/> | <input type="checkbox"/> |
| Motor cycle accident..... | <input type="checkbox"/> | <input type="checkbox"/> | <input type="checkbox"/> | <input type="checkbox"/> |
| Snowmobile accident.....  | <input type="checkbox"/> | <input type="checkbox"/> | <input type="checkbox"/> | <input type="checkbox"/> |
| 4-wheel motor cycle.....  | <input type="checkbox"/> | <input type="checkbox"/> | <input type="checkbox"/> | <input type="checkbox"/> |
| Tractor.....              | <input type="checkbox"/> | <input type="checkbox"/> | <input type="checkbox"/> | <input type="checkbox"/> |
| Accident by falling.....  | <input type="checkbox"/> | <input type="checkbox"/> | <input type="checkbox"/> | <input type="checkbox"/> |
| Cutting injury.....       | <input type="checkbox"/> | <input type="checkbox"/> | <input type="checkbox"/> | <input type="checkbox"/> |
| Other.....                | <input type="checkbox"/> | <input type="checkbox"/> | <input type="checkbox"/> | <input type="checkbox"/> |

**Has/have the accident(s) lead to reduced ability to work?**

Completely  Partly  Not at all

**FAMILY AND LINGUISTIC BACKGROUND**

**In Northern Norway there live people of different ethnic background. That is, they speak different languages and have different cultures. Examples of ethnic background, or ethnic group, is Norwegian, Sami and Kven.**

**Which language did/do you, your parents and grand parents speak at home?** (Tick one or more boxes)

|                 |                          |                          |                          |                      |
|-----------------|--------------------------|--------------------------|--------------------------|----------------------|
|                 | Norwegian                | Sami                     | Kven                     | Other, specify       |
| Mother's father | <input type="checkbox"/> | <input type="checkbox"/> | <input type="checkbox"/> | <input type="text"/> |
| Mother's mother | <input type="checkbox"/> | <input type="checkbox"/> | <input type="checkbox"/> | <input type="text"/> |
| Father's father | <input type="checkbox"/> | <input type="checkbox"/> | <input type="checkbox"/> | <input type="text"/> |
| Father's mother | <input type="checkbox"/> | <input type="checkbox"/> | <input type="checkbox"/> | <input type="text"/> |

|             |                          |                          |                          |                          |                      |
|-------------|--------------------------|--------------------------|--------------------------|--------------------------|----------------------|
|             | Norwegian                | Sami                     | Kven                     | Other, specify           |                      |
| Father..... | <input type="checkbox"/> | <input type="checkbox"/> | <input type="checkbox"/> | <input type="checkbox"/> | <input type="text"/> |
| Mother..... | <input type="checkbox"/> | <input type="checkbox"/> | <input type="checkbox"/> | <input type="checkbox"/> | <input type="text"/> |
| Myself..... | <input type="checkbox"/> | <input type="checkbox"/> | <input type="checkbox"/> | <input type="checkbox"/> | <input type="text"/> |

**What is your, your father's, and your mother's ethnic background?** (Tick one or more boxes)

|                          |                          |                          |                          |                          |                      |
|--------------------------|--------------------------|--------------------------|--------------------------|--------------------------|----------------------|
|                          | Norwegian                | Sami                     | Kven                     | Other, specify           |                      |
| My ethnic background ... | <input type="checkbox"/> | <input type="checkbox"/> | <input type="checkbox"/> | <input type="checkbox"/> | <input type="text"/> |
| My ethnic background ... | <input type="checkbox"/> | <input type="checkbox"/> | <input type="checkbox"/> | <input type="checkbox"/> | <input type="text"/> |
| My ethnic background ... | <input type="checkbox"/> | <input type="checkbox"/> | <input type="checkbox"/> | <input type="checkbox"/> | <input type="text"/> |

**What do you consider yourself to be?** (Tick one or more boxes)

Norwegian    Sami    Kven  
 Other, specify:

### EMPLOYMENT/ECONOMY

**What type of work/livelihood do you have?** (Tick one or more boxes)

Full time job with a fixed salary  
 Part time job with a fixed salary  
 Seasonal work    Self-employed  
 Unemployed    Homemaker (fulltime housework)  
 Old-age pension    Disability pension  
 Other, specify:

**Would you be willing to move if you were offered work somewhere else?**

Yes    No    Parts of the year    Uncertain  
Years   Months

**If you are out of work, for how long have you been seeking employment?** (Report whole numbers)

|  |  |  |  |  |  |
|--|--|--|--|--|--|
|  |  |  |  |  |  |
|--|--|--|--|--|--|

**If you are self-employed, what do you work with?**

(Tick one or more boxes)

Reindeer herding?    Fishing?    Farming?  
 Forestry?    Business?  
 Other, specify:

**How many persons are living in your household?** ..... (Number of persons)

|  |  |
|--|--|
|  |  |
|--|--|

**How large is your family's/household's gross income each year?**

Less than 150 000 NOK    150 000–300 000 NOK  
 301 000–450 000 NOK    451 000–600 000 NOK  
 601 000–750 000 NOK    More than 750 000 NOK

**How often do you participate in gambling (national lottery, football betting, gambling machines etc.)?**

Never/rarely    1–3 times a month    Once a week  
 2–6 times a week    Daily

**For how much money do you on average gamble per week?**

Less than 100 NOK    100–500 NOK  
 501–1000 NOK    More than 1000 NOK

### BULLYING

**By bullying we mean when one or more persons systematically and over time say or do bad things against you, and you have difficulty in defending yourself against them.**

**Have you experienced bullying?**

Yes, for the last 12 months    Yes, previously    No

**If you have been bullied, what kind of bullying did you experience?**

(Tick one or more boxes)

Talking behind your back/gossip    Being ignored  
 Discriminating remarks  
 Other, specify:

**Can you state where the bullying takes/took place?**

At school    At boarding school/dormitory  
 At work    In local community  
 Other, specify:
